# Supplementary material
Source: PubMed Central journal article supplement (PMC9833121)
Supplement: NIHMS1861000-supplement-Supplementary_Information.pdf [file NIHMS1861000-supplement-Supplementary_Information.pdf]

## Serial Femtosecond Crystallography – Supplementary Information

Thomas R.M. Barends<sup>1</sup>, Benjamin Stauch<sup>2</sup>, Vadim Cherezov<sup>2</sup>, Ilme Schlichting<sup>1†</sup>

<sup>1</sup> Department for Biological Mechanisms, Max Planck Institute for Medical Research, Heidelberg, Germany

<sup>2</sup> Department of Chemistry, The Bridge Institute, University of Southern California, Los Angeles, CA, USA

†email: [ilme.schlichting@mpimf-heidelberg.mpg.de](mailto:ilme.schlichting@mpimf-heidelberg.mpg.de)

| Synchrotron, location  | Beam-line   | Sample devices                   | Detector/ Frame rate                          | Analysis support /pipeline                                                                                                                                                                                  | Comments                                                                                                                                                                                                                                                                                                                                                              |
|------------------------|-------------|----------------------------------|-----------------------------------------------|-------------------------------------------------------------------------------------------------------------------------------------------------------------------------------------------------------------|-----------------------------------------------------------------------------------------------------------------------------------------------------------------------------------------------------------------------------------------------------------------------------------------------------------------------------------------------------------------------|
| APS, Chicago, USA      | SBC/19ID    | ALEX Holder, Chips, Fixed Target | PILATUS 6M / 100 Hz                           | Kanzus/Globus Flows Pipeline                                                                                                                                                                                | Time resolved serial available in collaboration with BioCARs at the APS                                                                                                                                                                                                                                                                                               |
|                        | BioCARs     | Chips DoT HVE inj. Microdrop     | Rayonix 340HS (10 Hz), epix10k (1 kHz)        | Precognition (Laue data processing; <a href="https://biocars.uchicago.edu/facilities/software/precognition-documentation">https://biocars.uchicago.edu/facilities/software/precognition-documentation</a> ) | Time-resolved Laue crystallography; ns and ps lasers                                                                                                                                                                                                                                                                                                                  |
|                        | GM/CA /23ID | chips, HVE inj., in-situ plates  | Pilatus3-6M, Eiger-16M                        | crystfel, cctbx_xfel                                                                                                                                                                                        | Contact beamline staff regarding types of in-situ plates                                                                                                                                                                                                                                                                                                              |
| CHESS, Cornell, USA    | ID7B2       | Chips                            | EIGER2 16M (130 Hz)                           | Semi-automatic procedure based on XDS and Python scripts                                                                                                                                                    | Collaboration with MiTeGen provides a variety of chips, as well as a humidity-controlled box for loading chips. Users are welcome to bring their own sample-handling devices.                                                                                                                                                                                         |
| DIAMOND, Harwell, UK   | I24         | Chips HVE inj.*                  | PILATUS 6M (100 Hz)<br>EIGER CdTe 9M (230 Hz) | Auto hit-finding/ hit-rate monitoring (DIALS).<br>Semi-automated indexing and integration (DIALS)<br>Other packages will can also be used/will work.                                                        | Primarily silicon chips but any fixed target/chipless chip.<br>PORTO laser ( <a href="https://lightcon.com/product/orpheus-opa/">https://lightcon.com/product/orpheus-opa/</a> ) and high power LEDs for photoexcitation.<br>Drop on chip mixing.<br>Anaerobic fixed targets available.<br>Acoustic chip loading.<br>Fixed target travel ranges (default setup) 50mm. |
| ESRF, Grenoble, France | ID29        | Chips HVE inj. microfluidic      | JUNGFRAU 4M up to 2kHz (typical 925 Hz)       | Under development (NanoPeakCell, CrystFEL)                                                                                                                                                                  | SSX fast translating horizontal range up to 5 cm<br>Nanosecond laser 400-2000nm + 355 nm<br>TR UV-vis absorption spectroscopy at icOS<br>Dedicated sample preparation laboratory<br>Possible to adapt user developed sample devices                                                                                                                                   |
| MAX IV, Lund, Sweden   | BIOMAX      | Chips HVE injection              | EIGER16M 100Hz (500Hz @4M)                    | (py)Dozor for spots-finding, Cctbx/crystFEL via PReSTO                                                                                                                                                      | For time-resolved experiment, so far we have mostly provided trigger device(s) and control, while users bring their own laser system. Pipelines to provide users feedback of hit-rate, indexing-rate etc are under development.                                                                                                                                       |

|                                            |                             |                                                           |                                                                                       |                                                                                                                                                                                                                                            |                                                                                                                                                                                                                                                                          |
|--------------------------------------------|-----------------------------|-----------------------------------------------------------|---------------------------------------------------------------------------------------|--------------------------------------------------------------------------------------------------------------------------------------------------------------------------------------------------------------------------------------------|--------------------------------------------------------------------------------------------------------------------------------------------------------------------------------------------------------------------------------------------------------------------------|
|                                            |                             |                                                           |                                                                                       |                                                                                                                                                                                                                                            | Chip size (travel range of scanning stage) 2.5 x 2.5 mm <sup>2</sup>                                                                                                                                                                                                     |
|                                            | Micro MAX                   | - Chips<br>- HVE & capillary injection                    | -EIGER2 X CdTe 9M (230 Hz @ 9M, 550 Hz @ 4M)<br>- JUNGFRUA Si 4M (2.2 kHz), from 2023 | (py)Dozor (spots-finding) and CrystFEL (indexing) online pipeline under development PReSTO software stack ( <a href="https://www.nsc.liu.se/support/presto/">https://www.nsc.liu.se/support/presto/</a> ) and HPC resource for offline use | - Wavelength-tunable nanosecond laser<br>- X-ray chopper down to 10 μs pulses and variable photon energy bandwidth (0.02, 0.3 & 1.0%)<br>- Support for chips up to ~ 30x30 mm <sup>2</sup><br>- Offline injector setup and laboratory space for light-sensitive samples. |
| <b>NLSL-II</b> , Brookhaven Natl. lab. USA | FMX                         | Chips HVE inj.*                                           | EIGER X 16M (133 Hz)/ 4M (750 Hz)                                                     | PyMDA CrystFEL                                                                                                                                                                                                                             | Oxford Chip <sup>1</sup><br>Droplet ejector (under construction)                                                                                                                                                                                                         |
| <b>PETRA III</b> , Hamburg, Germany        | P11                         | DoT and Chips                                             | EIGER 2 16M (130 Hz)                                                                  | nXDS and CrystFEL                                                                                                                                                                                                                          | Time resolved experiments are carried out with the tape drive in combination with a mixing device. A chopper wheel is available (up to 500 Hz) Automated data processing with CrystFEL is under development                                                              |
|                                            | P14.1<br><br>P14.2 (T-REXX) | HVE inj.*<br><br>Chips                                    | EIGER 2 16M CdTe (1120 Hz)<br><br>EIGER 4M (750 Hz)                                   | CrystFEL/DIMPLE<br><br>CrystFEL/DIMPLE                                                                                                                                                                                                     | 532, 630, 660 nm cw; 355, 532 nm pulsed<br><br>532, 630, 660 nm cw<br>355, 532 nm pulsed<br>HARE* <sup>2</sup><br>LAMA* <sup>3</sup>                                                                                                                                     |
| <b>SLS</b> , Villigen, Switzerland         | PXI/P XII<br><br>VESP A     | Chips<br><br>HVE inj.*<br>Single shot chips (2023)        | EIGER 16M (130 Hz)<br>JUNGFRUA 4M (2 kHz)                                             | ADP / XDS for small rotation wedges.<br>Single shot analysis pipeline in preparation                                                                                                                                                       | Tunable ns laser ( <a href="https://ekspla.com/product/nt230-series-nanosecond-tunable-dpss-lasers">https://ekspla.com/product/nt230-series-nanosecond-tunable-dpss-lasers</a> ), acoustic levitator                                                                     |
| <b>SPring-8</b> , Sayo, Japan              | BL32X U                     | Chips                                                     | Eiger X 9M (238 Hz)                                                                   | • Auto hit-finding using SHIKA (backend Cheetah)<br>• Semi-automated indexing and integration (CrystFEL)                                                                                                                                   | Automated data collection using SSX-ROX down to sub-micron crystals                                                                                                                                                                                                      |
|                                            | BL45X U                     | Chips                                                     | PILATUS3 X 6M (100 Hz)                                                                |                                                                                                                                                                                                                                            | Automated data collection using SSX-ROX                                                                                                                                                                                                                                  |
|                                            | BL41X U                     | Chips, HVE inj. <sup>4</sup> (being installed)            | Eiger X 16M (133 Hz)<br>Eiger2 X CdTe 4M (500 Hz)                                     |                                                                                                                                                                                                                                            | • Automated data collection using SSX-ROX<br>• Tunable ns laser NT230-30Hz (Ekspla)<br>• Fixed target stage with 50 mm stroke (under installation)                                                                                                                       |
| <b>SSRL</b> , Stanford, CA, USA            | 12-1                        | Chips/fix ed target, injectors (liquid or viscous media)  | EIGER 16M 2-XE (500 Hz)                                                               | Real-time SX data analysis pipeline                                                                                                                                                                                                        | SX-Rot (90°/sec), pink beam multilayer in commissioning, sister beam line to LCLS-MFX standard goniometer setup at MFX, fully remote access fixed-target collection at controlled humidity, controlled temperature or cryogenic conditions                               |
|                                            | 12-2                        | Chips/fix ed-target, Injectors (liquid and viscous media) | EIGER 16 M (100 Hz)                                                                   | Real-time SX data analysis pipeline                                                                                                                                                                                                        |                                                                                                                                                                                                                                                                          |

**Supplementary Table 1: Synchrotron sources with serial synchrotron crystallography capability.**

\* In collaboration with facility/ instrument scientists

1. Ebrahim, A. *et al.* Dose-resolved serial synchrotron and XFEL structures of radiation-sensitive metalloproteins. *IUCrJ* **6**, 543-551 (2019).
2. Schulz, E.C. *et al.* The hit-and-return system enables efficient time-resolved serial synchrotron crystallography. *Nat Methods* **15**, 901-904 (2018).
3. Mehrabi, P. *et al.* Liquid application method for time-resolved analyses by serial synchrotron crystallography. *Nat. Methods* **16**, 979-982 (2019).
4. Shimazu, Y. *et al.* High-viscosity sample-injection device for serial femtosecond crystallography at atmospheric pressure. *J Appl Crystallogr* **52**, 1280-1288 (2019).
